# Supplementary material
Source: ML conference proceedings conference paper supplement (https://aclanthology.org/2020.emnlp-main.264)
Supplement: OptionalSupplementaryMaterial [file EMNLP_2020___ChartQA__Supplementary_.pdf › EMNLP_2020___ChartQA__Supplementary_.pdf]

# STL-CQA: Supplementary Material

**Hrituraj Singh**  
Adobe Research  
hrrisingh@adobe.com

**Sumit Shekhar**  
Adobe Research  
sushekha@adobe.com

## 1 Dataset

In this section, we describe our LEAF-QA++ Dataset. In Table 1, we present the statistics of the different types of charts, for the sake of completion even though the numbers remain same as LEAF-QA. We primarily discuss the changes (i.e. delta) we made to LEAF-QA while not focusing much on the details of things which have been left same. We discuss both question as well as chart changes.

**Questions:** We increase the number of question templates from 35 to 75 while adding 3-8 manually written paraphrases for each. On the basis of category, we enlist sample questions along with their paraphrases:

### (a) Structural:

- What type of graph is this ?
  - What is the type of this graph ?
  - Which category of graph does this figure belong to ?
  - What is the graph type ?
  - Which type of graph does this image represent ?
- Is there a legend in this graph ?
  - Do we have a legend in this graph ?
  - Is the legend visible ?
  - Does there exist a legend in the figure
  - Does this graph have a legend ?
- How many labels are there in the legend ?
  - What is the number of legend labels in this graph ?
  - What is the count of legend labels ?
  - How many legend labels are there in this graph ?

- Is there a grid in this graph ?

- Does the graph have a grid ?
- Does there exist a grid in this graph ?
- Is a grid present in this graph ?

### (b) Data

- What does the  $i$  bar from left in each group represent ?
  - What is bar  $i$  from left in each group representing ?
  - If we count  $i$  from left and reach a bar, what does that bar represent ?
- Does the value of `legend_label_i` monotonically increase over `xtitle`?
  - Does the `legend_label_i` never decrease or remain same over `xtitle` ?
  - Is there a continuous increase for `legend_label_i` over `xtitle` ?
  - Is the `legend_label_i` only increasing over `xtitle` ?
  - Is the `legend_label_i` monotonically increasing over the `xtitle` axis ?
- How many groups or stacks of bars have ratio less than 2 between highest and lowest value bars ?
  - For how many groups or stacks of bars does the ration remain lower than 2 between highest and lowest value bars ?
  - How many groups or stacks of bars have highest bars value falling short of the two times value of the lowest value bars ?
  - In what number of groups or stacks does the ratio between highest value bar and lowest value bar falls short of 2 ?

| Type                         | Train | Test-Familiar | Test-Novel |
|------------------------------|-------|---------------|------------|
| Vertical Stacked Bar Graph   | 13403 | 2736          | 627        |
| Horizontal Stacked Bar Graph | 13720 | 2686          | 623        |
| Vertical Grouped Bar Graph   | 8561  | 1756          | 597        |
| Horizontal Grouped Bar Graph | 8587  | 1674          | 653        |
| Linegraph                    | 41881 | 8381          | 2500       |
| Scatter Plot                 | 41710 | 8336          | 550        |
| Pie Chart                    | 7006  | 1444          | 1250       |
| Donut Chart                  | 21204 | 4221          | 1248       |
| Horizontal Box Plots         | 20961 | 4203          | 48         |
| Vertical Box Plots           | 21012 | 4167          | 52         |

Table 1: Statistics of different chart types over three splits of the dataset

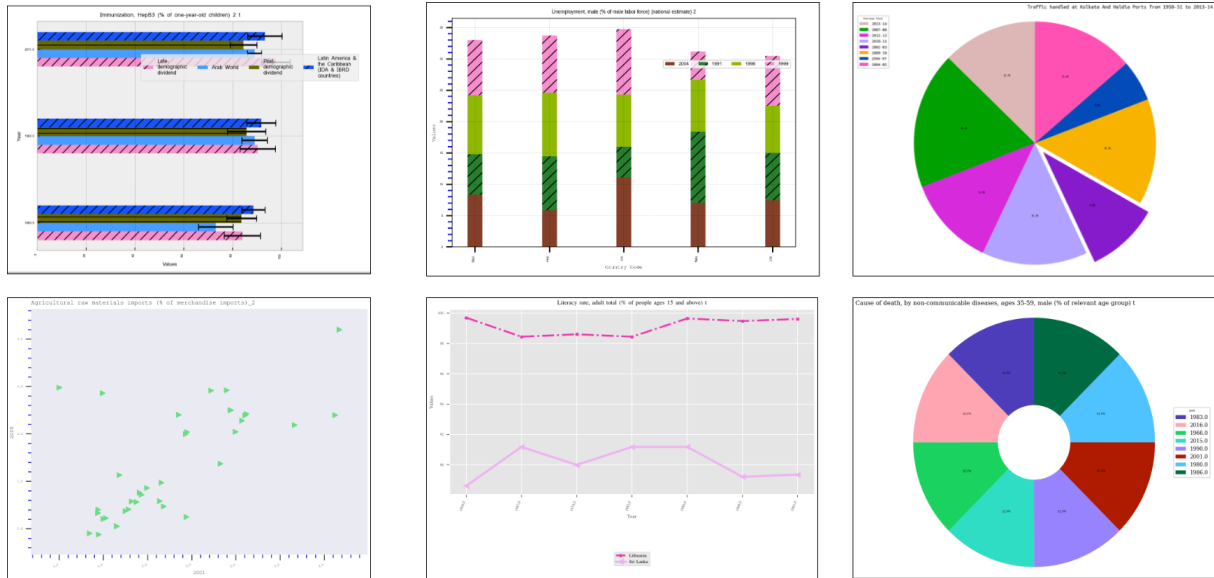

Figure 1: Samples from the proposed dataset

| Item                      | Remarks                                                                                                                            |
|---------------------------|------------------------------------------------------------------------------------------------------------------------------------|
| Font Size                 | [4.5, 5, 5.5, 6, 6.5, 7, 7.5, 8]                                                                                                   |
| Font Families             | 25 Font Families                                                                                                                   |
| Background Styles         | 15 Background Styles                                                                                                               |
| Text on Bars              | Present in Grouped bar plots only with 50% presence and 50% rotation probability                                                   |
| Random Axis Disappearance | Absent only in Grouped Bar Plots with Text on bars                                                                                 |
| Width Variation (Bars)    | [0.1,0.15,0.2,0.25]                                                                                                                |
| Gridlines (Width)         | Uniformly Sampled from (0.1,0.55)                                                                                                  |
| Exploding Pie Charts      | Explosion happens with 50% probability at a randomly selected pie (one)                                                            |
| Axis Ticks                | Random Appearance of minor ticks<br>Color : ['r', 'b', 'm', 'k']<br>length : minor (3,4,5), major (6,7,8)<br>width : [1,1.5,2,2.5] |

Table 2: Changes introduced to the LEAF-QA Images

- In or at which xtitle does legend\_label\_i have highest ytitle ?
  - Which xtitle does the legend\_label\_i have highest ytitle for ?
  - For which xtitle does the legend\_label\_i have highest ytitle ?
  - Which is the xtitle having highest ytitle
- Which xtitle does the legend\_label\_i have

*for legend\_label\_i ?*

**(c) Relational**

- Between legend\_label\_i and legend\_label\_i , which has higher ytitle for xlabel\_i ?
  - *For xlabel\_i , which one has higher ytitle between legend\_label\_i and legend\_label\_i ?*
  - *Which of the point between legend\_label\_i and legend\_label\_i has higher ytitle for xlabel\_i ?*
  - *For xlabel\_i , which of the point between legend\_label\_i and legend\_label\_i has higher ytitle ?*
- Does there exist any xtitle where legend\_label\_i has higher ytitle than legend\_label\_i ?
  - *Is there any xtitle for which legend\_label\_i has higher ytitle than legend\_label\_i ?*
  - *Do we have atleast one xtitle where legend\_label\_i has higher ytitle than legend\_label\_i ?*
  - *Does legend\_label\_i have higher ytitle than legend\_label\_i for any xtitle ?*
  - *Is there an existence of xtitle where legend\_label\_i has higher ytitle than legend\_label\_i ?*
- In what xtitle is the sum of legend\_label\_i and legend\_label\_i lower than legend\_label\_i ?
  - *Which xtitle has the value of legend\_label\_i and legend\_label\_i combined together less than that of legend\_label\_i ?*
  - *For which xtitle does the sum of values of legend\_label\_i and legend\_label\_i fall short of legend\_label\_i ?*
  - *Which is the xtitle for which the sum of legend\_label\_i and legend\_label\_i is lower than legend\_label\_i ?*
  - *For which xtitle do we have sum of legend\_label\_i and legend\_label\_i lesser than legend\_label\_i ?*
- In or at which xtitle does legend\_label\_i and legend\_label\_i have highest diff ?
  - *What point in xtitle does legend\_label\_i and legend\_label\_i have highest difference at ?*

- *Which is the xtitle for which legend\_label\_i and legend\_label\_i have highest difference ?*
- *What is the xtitle that has highest difference between legend\_label\_i and legend\_label\_i ?*

**Charts:** We introduce a variety of changes in the chart images as well to make them more diverse and simulate real world scenario. Some prominent changes include - invisible-axes, axes major and minor ticks, background style and font variations as summarized in Table 2 and some samples shown in Fig. 1

## 2 Localization

For localization, we generate masks using geometrical methods since only bounding box information is available in the data. To generate masks for rectangular objects like bars, boxes, text-objects - the process is fairly simple. For line, pie or donut, however, the mechanism requires explanation. For lines, the bounding box is provided only for the marker points - we use those marker points to generate rectangular bounding boxes (and masks). For pie and donuts, we use bounding boxes to find the center of the pie (or donut). We then find out coordinates on the circle perimeter by 1 degree movements along the circumference using projections of radius (again found using bounding boxes). We show some results using our detection method as a sample and provide quantitative analysis over the main 20 elements of the chart in Table. 3

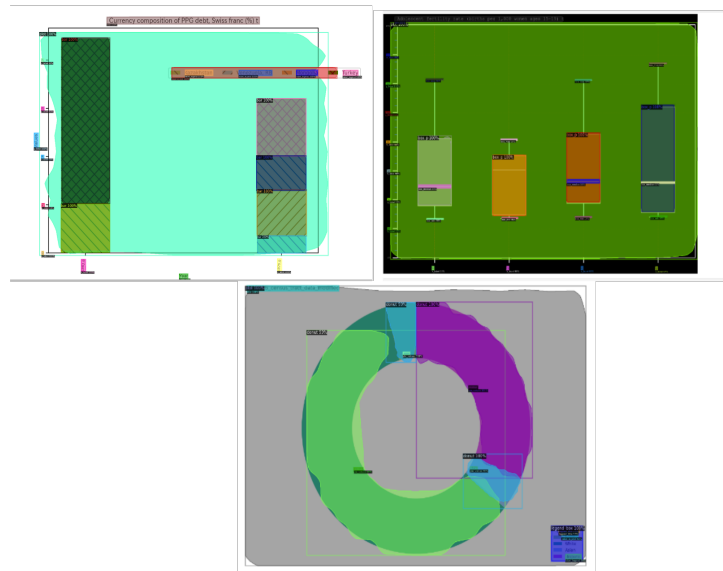

Figure 2: Sample Detector Results

| Element      | P    | R    | Element      | P    | R    | Element    | P    | R    | Element      | P    | R    |
|--------------|------|------|--------------|------|------|------------|------|------|--------------|------|------|
| Legend Box   | 0.94 | 0.98 | Pie Values   | 0.99 | 0.98 | Donut      | 0.98 | 0.99 | Legend Label | 0.88 | 0.99 |
| Legend Patch | 0.94 | 0.73 | Legend Title | 0.96 | 0.89 | Title      | 1.0  | 0.99 | Line         | 0.97 | 0.96 |
| Y-axis Label | 0.99 | 0.99 | Marker       | 0.92 | 0.65 | Y-Title    | 0.99 | 0.99 | X-axis Label | 1.0  | 0.99 |
| X-Title      | 1.0  | 1.0  | Bar          | 0.93 | 0.94 | Pie        | 0.97 | 0.94 | Box          | 0.96 | 0.93 |
| Box Minimum  | 0.80 | 0.67 | Box Maximum  | 0.60 | 0.55 | Box Median | 0.64 | 0.58 | Pie Label    | 0.98 | 0.99 |

Table 3: Result on test set for chart elements detection framework
